# Supplementary material
Source: publisher figshare collection journal article supplement (https://tandf.figshare.com/ndownloader/files/14038355)
Supplement: Supplementary file 1 [file 14038355]

|  | **Intraobserver Variability** | **Interobserver Variability** |
| --- | --- | --- |
| ICC (95% CI) | ICC (95% CI) |
| PW LS. | 0.88 (0.65 to 0.96) | 0.75 (0.23 to 0.90) |
| PW TS | 0.86 (0.58 to 0.95) | 0.93 (0.80 to 0.97) |
| AW LS | 0.86 (0.59 to 0.95) | 0.80 (0.43 to 0.93) |
| AW TS | 0.84(0.52 to 0.94) | 0.89 (0.69 to 0.96) |
| LS endo | 0.86 ( 0.61 to 0.95) | 0.87 (0.65 to 0.96) |
| LS myo | 0.85 (0.41 to 0.94) | 0.82 (0.51 to 0.96) |
| LS epi | 0.85 (0.35 to 0.96) | 0.80 (0.64 to 0.94) |
| CS endo | 0.89 (0.64 to 0.96) | 0.96 (0.88 to 0.98) |
| CS myo | 0.92 (0.78 to 0.97) | 0.96 (0.89 to 0.98) |
| CS epi | 0.85 (0.58 to 0.95) | 0.81 (0.40 to 0.93) |
| LSR endo | 0.87 (0.63 to 0.95) | 0.84 (0.56 to 0.94) |
| LSR myo | 0.92 (0.77 to 0.97) | 0.82 (0.57 to 0.94) |
| LSR epi | 0.89(0.71 to 0.96) | 0.80(0.41 to 0.97) |
| CSR endo | 0.84 (0.54 to 0.93) | 0.82(0.52 to 0.95) |
| CSR myo | 0.82 (0.46 to 0.94) | 0.81(0.44 to 0.94) |
| CSR epi | 0.76 (0.35 to 0.89) | 0.76(0.37 to 0.88) |
|  |  |  |

**Supplementary Table S1.** Interobserver and intraobserver variabilities of Aortic wall and LV strains

AW:Anterior wall, CI:confidence interval; CS:circumferential strain; CSR:circumferential strain rate, endo:endocardial; epi:epicardial; ICC:intraclass correlation coefficient; IMT:intima-media thickness; LS:longitudinal strain; LSR:longitudinal strain rate, LV:left ventricular; myo=myocardial and; RS:radial strain.
